# Supplementary material
Source: Springer Nature journal article supplement (https://www.springermedizin.de/resource/supplementary/12911_2010_339_MOESM5_ESM.pdf/9525516)

User Id:

Password:

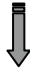

## Glioma Subtype Prediction

**Sample File**

00352142\_U133P2

E09264\_U133P2

E09278\_U133P2

E09289\_U133P2

E09296\_U133P2

E09331\_U133P2

E09334\_U133P2

E09358\_U133P2

E09369\_U133P2

[Gene Pattern Home](#)

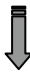

Gene Pattern Job Results

Your request has been sent to GenePattern for processing, and your job id is : 385. When your task is complete, your data will be ready for analysis in GenePattern. Your available tasks will appear in the right sidebar of the GenePattern when they are ready. The approximate processing time is 2-3 minutes.

- [Job# 385 \(NOB Glioma Subtype Prediction Module\)](#) completed ✓

All available Gene Pattern jobs

- [Job# 382 \(NOB Glioma Subtype Prediction Module\)](#) completed ✓
- [Job# 383 \(NOB Glioma Subtype Prediction Module\)](#) completed ✓
- [Job# 384 \(NOB Glioma Subtype Prediction Module\)](#) completed ✓

Click the following output file names to see the results.

- [Welch PCA prediction.pdf](#)

Please click the above link to launch GenePattern when it has been completed. If your task does not appear in the sidebar, please wait a minute and refresh the GenePattern page to try again.

[Gene Pattern Home](#)

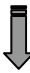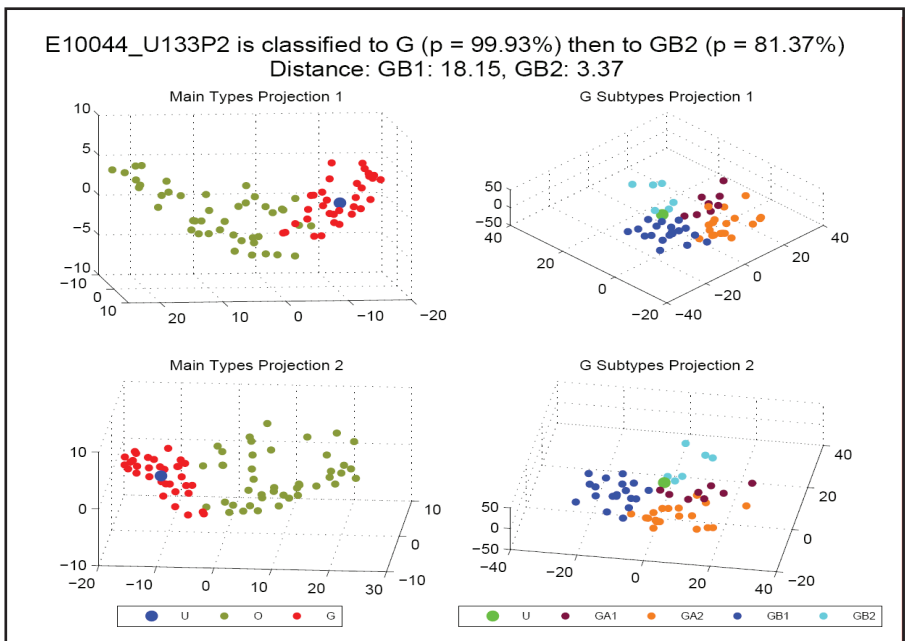

Supplement: MOESM5 [file 9525516]
